# Supplementary material
Source: MDPI journal article supplement (https://www.mdpi.com/2311-5637/9/3/289)
Supplement: s1 [file s1]

-- Supplementary Data --

## Valorization of *Delonix regia* Pods for Bioethanol Production

Zafar Iqbal <sup>1,\*</sup>, Adarsh Siddiqua <sup>2</sup>, Zahid Anwar <sup>2</sup> and Muhammad Munir <sup>3</sup>

<sup>1</sup> Central Laboratories, King Faisal University, Al-Ahsa P.O. Box 31982, Saudi Arabia

<sup>2</sup> Department of Biochemistry and Biotechnology, University of Gujrat, Gujrat 50700, Pakistan

<sup>3</sup> Date Palm Research Center of Excellence, King Faisal University, Al-Ahsa P.O. Box 31982, Saudi Arabia

\* Correspondence: zafar@kfu.edu.sa; Tel.: +966-580776536

**Table S1:** Response surface regression analysis for glucose production and the interactive effects of substrate concentration versus substrate concentration (g), time (min), Acid concentration (%), and temperature (°C)

| Analysis of Variance      |    |                |             |         |          |                 |
|---------------------------|----|----------------|-------------|---------|----------|-----------------|
| Source                    | df | Sum of Squares | Mean Square | F-value | p-value  |                 |
| <b>Model</b>              | 14 | 0.0690         | 0.0049      | 29.72   | < 0.0001 | significant     |
| A-Substrate concentration | 1  | 0.0061         | 0.0061      | 36.59   | < 0.0001 |                 |
| B-Time                    | 1  | 0.0014         | 0.0014      | 8.28    | 0.0115   |                 |
| C-Acid concentration      | 1  | 0.0225         | 0.0225      | 135.59  | < 0.0001 |                 |
| D-Temperature             | 1  | 0.0001         | 0.0001      | 0.6129  | 0.4459   |                 |
| AB                        | 1  | 0.0012         | 0.0012      | 7.46    | 0.0155   |                 |
| AC                        | 1  | 0.0311         | 0.0311      | 187.52  | < 0.0001 |                 |
| AD                        | 1  | 0.0029         | 0.0029      | 17.24   | 0.0009   |                 |
| BC                        | 1  | 0.0020         | 0.0020      | 12.16   | 0.0033   |                 |
| BD                        | 1  | 0.0000         | 0.0000      | 0.2591  | 0.6181   |                 |
| CD                        | 1  | 0.0181         | 0.0181      | 109.07  | < 0.0001 |                 |
| A <sup>2</sup>            | 1  | 0.0014         | 0.0014      | 8.17    | 0.0120   |                 |
| B <sup>2</sup>            | 1  | 0.0020         | 0.0020      | 11.91   | 0.0036   |                 |
| C <sup>2</sup>            | 1  | 0.0007         | 0.0007      | 4.38    | 0.0537   |                 |
| D <sup>2</sup>            | 1  | 0.0013         | 0.0013      | 8.10    | 0.0122   |                 |
| <b>Residual</b>           | 15 | 0.0025         | 0.0002      |         |          |                 |
| Lack of Fit               | 11 | 0.0019         | 0.0002      | 1.15    | 0.4874   | not significant |
| Pure Error                | 4  | 0.0006         | 0.0001      |         |          |                 |
| <b>Cor Total</b>          | 29 | 0.0715         |             |         |          |                 |

**Table S2:** Model fit summary for Glucose production

|           |        |                          |         |
|-----------|--------|--------------------------|---------|
| Std. Dev. | 0.0129 | R <sup>2</sup>           | 0.9652  |
| Mean      | 0.1382 | Adjusted R <sup>2</sup>  | 0.9327  |
| C.V. %    | 9.32   | Predicted R <sup>2</sup> | 0.8511  |
|           |        | Adeq Precision           | 24.0197 |

**Table S3:** Final equation of glucose production in terms of actual factors

|               |                                              |
|---------------|----------------------------------------------|
| Glucose yield | =                                            |
| +0.287255     |                                              |
| -2.31915      | Substrate concentration                      |
| +0.002681     | Time                                         |
| -0.204528     | Acid concentration                           |
| +0.001721     | Temperature                                  |
| -0.005919     | Substrate concentration * Time               |
| +0.577122     | Substrate concentration * Acid concentration |
| +0.015446     | Substrate concentration * Temperature        |
| -0.000358     | Time * Acid concentration                    |
| +4.48050E-06  | Time * Temperature                           |
| +0.001829     | Acid concentration * Temperature             |
| +2.80443      | Substrate concentration <sup>2</sup>         |
| -0.000020     | Time <sup>2</sup>                            |
| +0.004760     | Acid concentration <sup>2</sup>              |
| -0.000039     | Temperature <sup>2</sup>                     |

**Table S4:** Response surface regression analysis for xylose production and the interactive effects of substrate concentration versus substrate concentration (g), time (min), Acid concentration (%), temperature (°C)

| Analysis of Variance      |    |                |             |         |          |             |
|---------------------------|----|----------------|-------------|---------|----------|-------------|
| Source                    | df | Sum of Squares | Mean Square | F-value | p-value  |             |
| Model                     | 14 | 0.0690         | 0.0049      | 29.72   | < 0.0001 | significant |
| A-Substrate concentration | 1  | 0.0061         | 0.0061      | 36.59   | < 0.0001 |             |
| B-Time                    | 1  | 0.0014         | 0.0014      | 8.28    | 0.0115   |             |
| C-Acid concentration      | 1  | 0.0225         | 0.0225      | 135.59  | < 0.0001 |             |
| D-Temperature             | 1  | 0.0001         | 0.0001      | 0.6129  | 0.4459   |             |
| AB                        | 1  | 0.0012         | 0.0012      | 7.46    | 0.0155   |             |

|                  |    |        |        |        |          |                 |
|------------------|----|--------|--------|--------|----------|-----------------|
| AC               | 1  | 0.0311 | 0.0311 | 187.52 | < 0.0001 |                 |
| AD               | 1  | 0.0029 | 0.0029 | 17.24  | 0.0009   |                 |
| BC               | 1  | 0.0020 | 0.0020 | 12.16  | 0.0033   |                 |
| BD               | 1  | 0.0000 | 0.0000 | 0.2591 | 0.6181   |                 |
| CD               | 1  | 0.0181 | 0.0181 | 109.07 | < 0.0001 |                 |
| A <sup>2</sup>   | 1  | 0.0014 | 0.0014 | 8.17   | 0.0120   |                 |
| B <sup>2</sup>   | 1  | 0.0020 | 0.0020 | 11.91  | 0.0036   |                 |
| C <sup>2</sup>   | 1  | 0.0007 | 0.0007 | 4.38   | 0.0537   |                 |
| D <sup>2</sup>   | 1  | 0.0013 | 0.0013 | 8.10   | 0.0122   |                 |
| <b>Residual</b>  | 15 | 0.0025 | 0.0002 |        |          |                 |
| Lack of Fit      | 11 | 0.0019 | 0.0002 | 1.15   | 0.4874   | not significant |
| Pure Error       | 4  | 0.0006 | 0.0001 |        |          |                 |
| <b>Cor Total</b> | 29 | 0.0715 |        |        |          |                 |

**Table S5:** Model fit summary for Xylose production

|                  |        |                                |         |
|------------------|--------|--------------------------------|---------|
| <b>Std. Dev.</b> | 0.0129 | <b>R<sup>2</sup></b>           | 0.9652  |
| <b>Mean</b>      | 0.1382 | <b>Adjusted R<sup>2</sup></b>  | 0.9327  |
| <b>C.V. %</b>    | 9.32   | <b>Predicted R<sup>2</sup></b> | 0.8511  |
|                  |        | <b>Adeq Precision</b>          | 24.0197 |

**Table S6:** Final equation of xylose production in terms of actual factors

|               |                                              |
|---------------|----------------------------------------------|
| Glucose yield | =                                            |
| +0.287255     |                                              |
| -2.31915      | Substrate concentration                      |
| +0.002681     | Time                                         |
| -0.204528     | Acid concentration                           |
| +0.001721     | Temperature                                  |
| -0.005919     | Substrate concentration * Time               |
| +0.577122     | Substrate concentration * Acid concentration |
| +0.015446     | Substrate concentration * Temperature        |
| -0.000358     | Time * Acid concentration                    |
| +4.48050E-06  | Time * Temperature                           |
| +0.001829     | Acid concentration * Temperature             |
| +2.80443      | Substrate concentration <sup>2</sup>         |
| -0.000020     | Time <sup>2</sup>                            |

|           |                                 |
|-----------|---------------------------------|
| +0.004760 | Acid concentration <sup>2</sup> |
| -0.000039 | Temperature <sup>2</sup>        |

**Table S7:** Response surface regression analysis for lignin degradation and the interactive effects of substrate concentration versus substrate concentration (g), time (min), Acid concentration (%), temperature (°C)

| Analysis of Variance      |    |                |             |         |          |                 |
|---------------------------|----|----------------|-------------|---------|----------|-----------------|
| Source                    | df | Sum of Squares | Mean Square | F-value | p-value  |                 |
| <b>Model</b>              | 14 | 5575.74        | 398.27      | 35.66   | < 0.0001 | significant     |
| A-Substrate concentration | 1  | 173.37         | 173.37      | 15.52   | 0.0013   |                 |
| B-Time                    | 1  | 746.57         | 746.57      | 66.84   | < 0.0001 |                 |
| C-Acid concentration      | 1  | 99.77          | 99.77       | 8.93    | 0.0092   |                 |
| D-Temperature             | 1  | 233.09         | 233.09      | 20.87   | 0.0004   |                 |
| AB                        | 1  | 2596.71        | 2596.71     | 232.48  | < 0.0001 |                 |
| AC                        | 1  | 190.48         | 190.48      | 17.05   | 0.0009   |                 |
| AD                        | 1  | 7.33           | 7.33        | 0.6565  | 0.4305   |                 |
| BC                        | 1  | 246.37         | 246.37      | 22.06   | 0.0003   |                 |
| BD                        | 1  | 178.44         | 178.44      | 15.98   | 0.0012   |                 |
| CD                        | 1  | 308.73         | 308.73      | 27.64   | < 0.0001 |                 |
| A <sup>2</sup>            | 1  | 342.54         | 342.54      | 30.67   | < 0.0001 |                 |
| B <sup>2</sup>            | 1  | 26.99          | 26.99       | 2.42    | 0.1409   |                 |
| C <sup>2</sup>            | 1  | 255.15         | 255.15      | 22.84   | 0.0002   |                 |
| D <sup>2</sup>            | 1  | 414.06         | 414.06      | 37.07   | < 0.0001 |                 |
| <b>Residual</b>           | 15 | 167.54         | 11.17       |         |          |                 |
| Lack of Fit               | 6  | 62.60          | 10.43       | 0.8948  | 0.5371   | not significant |
| Pure Error                | 9  | 104.94         | 11.66       |         |          |                 |
| <b>Cor Total</b>          | 29 | 5743.28        |             |         |          |                 |

**Table S8:** Model fit summary for lignin degradation

|                  |       |                                |         |
|------------------|-------|--------------------------------|---------|
| <b>Std. Dev.</b> | 3.34  | <b>R<sup>2</sup></b>           | 0.9708  |
| <b>Mean</b>      | 22.64 | <b>Adjusted R<sup>2</sup></b>  | 0.9436  |
| <b>C.V. %</b>    | 14.76 | <b>Predicted R<sup>2</sup></b> | 0.8293  |
|                  |       | <b>Adeq Precision</b>          | 21.0692 |

**Table S9:** Final equation of Lignin degradation in terms of actual factors

|               |                                              |
|---------------|----------------------------------------------|
| Glucose yield | =                                            |
| +194.10273    |                                              |
| -631.45383    | Substrate concentration                      |
| -2.55198      | Time                                         |
| +15.76064     | Acid concentration                           |
| -2.92388      | Temperature                                  |
| +10.17595     | Substrate concentration * Time               |
| -54.34180     | Substrate concentration * Acid concentration |
| -1.17454      | Substrate concentration * Temperature        |
| +0.146950     | Time * Acid concentration                    |
| +0.011635     | Time * Temperature                           |
| -0.301858     | Acid concentration * Temperature             |
| +1467.98082   | Substrate concentration <sup>2</sup>         |
| +0.002197     | Time <sup>2</sup>                            |
| +2.87781      | Acid concentration <sup>2</sup>              |
| +0.021096     | Temperature <sup>2</sup>                     |

**Table S10:** Glucose recovery after enzymatic hydrolysis at different time-periods

| Units (U mL <sup>-1</sup> ) | Sample time (hrs) |       |       |       |       |
|-----------------------------|-------------------|-------|-------|-------|-------|
|                             | 1.5               | 3     | 24    | 48    | 72    |
| 0.5                         | 7.28              | 9.0   | 10.57 | 12.28 | 13.96 |
| 1.0                         | 18.71             | 20.42 | 21.97 | 23.85 | 25.57 |
| 1.5                         | 27.0              | 28.28 | 29.85 | 31.49 | 33.71 |
| 3.0                         | 35.38             | 37.71 | 39.85 | 41.28 | 55.28 |
| 5.0                         | 35.57             | 37.85 | 39.99 | 41.28 | 55.57 |
